# Supplementary material for: miRNA Predictors of Pancreatic Cancer Chemotherapeutic Response: A Systematic Review and Meta-Analysis
Source: MDPI journal article supplement (doi:10.3390/cancers11070900), 2019-06-27
Supplement: s1 [file s1]

# Supplementary Materials: miRNA Predictors of Pancreatic Cancer Chemotherapeutic Response: A Systematic Review and Meta-Analysis

Madurantakam Royam Madhav, Rithika Ramesh, Ritika Shanker, Shanthi Sabarimurugan, Chellan Kumarasamy, Nachimuthu Ramesh, Kodiveri Muthukalianan Gothandam, Siddharta Baxi, Ajay Gupta, Sunil Krishnan and Rama Jayaraj

**Table S1.** The search strategy.

|   |                                                                                                                                         |
|---|-----------------------------------------------------------------------------------------------------------------------------------------|
| 1 | "Pancreatic" OR "Pancreatic cancer" [Title]                                                                                             |
| 2 | "Pancreatic" OR "Pancreatic cancer" [Title] OR "miRNA" or "microRNA" [Title]                                                            |
| 3 | "Pancreatic" OR "Pancreatic cancer" [Title] OR "Drug resistance" [Title]                                                                |
| 4 | "Pancreatic" OR "Pancreatic cancer" [Title] OR "Chemoresistance" [Title]                                                                |
| 5 | "Pancreatic" OR "Pancreatic cancer" [Title] OR "Chemosensitivity" [Title]                                                               |
| 6 | "Pancreatic" OR "Pancreatic cancer" [Title] OR "miRNA" OR "microRNA" [Title] OR "Drug resistance" [Title]                               |
| 7 | "Pancreatic" OR "Pancreatic cancer" [Title] OR "miRNA" OR "microRNA" [Title] OR "Chemoresistance" [Title]                               |
| 8 | "Pancreatic" OR "Pancreatic cancer" [Title] OR "miRNA" OR "microRNA" [Title] OR "Chemosensitivity" [Title]                              |
| 9 | "Pancreatic" OR "Pancreatic cancer" [Title] OR "miRNA" OR "microRNA" [Title] OR "Chemoresistance" [Title] OR "Chemosensitivity" [Title] |

**Table S2.** Quality assessment of the included studies.

| S.No | Criteria                                                         | Bad (0–33%) | Satisfactory (33–66 %) | Good (67–100%) |
|------|------------------------------------------------------------------|-------------|------------------------|----------------|
| 1    | The objective of this paper stated                               | -           | -                      | 43 Studies     |
| 2    | Study population clearly specified                               | -           | -                      | 43 Studies     |
| 3    | Participation rate of eligible persons at least 50%              | -           | -                      | 43 Studies     |
| 4    | Eligibility criteria                                             | -           | -                      | 43 Studies     |
| 5    | Sample size justification                                        | -           | -                      | 43 Studies     |
| 6    | miRNA Exposure assessed before outcome measurement               | -           | 12 Studies             | 31 Studies     |
| 7    | Timeframe sufficient for the patients (OS, DFS or MFS)           | NA          | NA                     | NA             |
| 8    | Different levels of the exposure of interest (mode of treatment) | -           | 10 Studies             | 33 Studies     |
| 9    | Exposure measures and assessment (staging of cancer, TNM)        | -           | 3 Studies              | 40 Studies     |
| 10   | Repeated exposure assessment                                     | -           | -                      | 12 Studies     |
| 11   | Outcome measures (HR, and CI )                                   | -           | -                      | 13 Studies     |
| 12   | Blinding of outcome assessors                                    | NA          | NA                     | NA             |
| 13   | Follow-up rate                                                   | -           | 41 studies             | 2 Studies      |
| 14   | Statistical analysis                                             | -           | -                      | 43 Studies     |
|      | <b>Total Selected studies</b>                                    | <b>0</b>    | <b>0</b>               | <b>43</b>      |
